# Supplementary material
Source: PubMed Central journal article supplement (PMC3656460)
Supplement: supp_80.14.1300_Predicting_cognitive_decline.pdf [file supp_80.14.1300_Predicting_cognitive_decline.pdf]

## Predicting cognitive decline: A dementia risk score vs the Framingham vascular risk scores

التنبؤ بالإنخفاض المعرفي

نسبة اختطار العته مقابل نسبة اختطار فرامينجهم للأوعية الدموية

**الهدف:** هدفنا كان مقارنة اثنين من مجموع احراز التخطر لدراسة فرامينجهم بمجموع احراز اختطار العته نسبة الى الانخفاض المعرفي على مدار عشر سنين لنهاية منتصف العمر .

**طريقة البحث:** كان المشاركون رجالا ونساء ذوي متوسط عمر ٥٥,٦ عند خط البداية من الدراسة البريطانية الاترايبية المطولة المسماه وايتال ٢. قمنا بمقارنة مجموع اختطار أمراض الأوعية الدموية عامه لدراسه فرامينجهم ومجموع اختطار الجلطات الدماغية وذلك بعوامل اختطار الأوعية, تقدم السن والعته (CAIDE) والذي يستخدم عوامل اختطار منتصف العمر للتكهّن بالعته المتأخر . اشتملت الاختبارات المعرفية على التسبب, الذاكرة, الفصاحة اللفظية, مفردات اللغة والادراك العام, وتم التقييم ثلاث مرات على مدار عشر سنوات..

**النتائج :** ارتبطت المعدلات المرتفعة لعوامل اختطار الأوعية بانخفاض معرفي أكبر لجميع الاختبارات فيما عدا الذاكرة; ارتبط ارتفاع اختطار العته بتدني اعظم في التسبب, مفردات اللغة والادراك العام. عند المقارنه بمجموع احراز اختطار العته فان اختطار أمراض الأوعية الدموية واختطار الجلطات الدماغية كانا أوثق ارتباطا بالإنخفاض المعرفي عند ١٠ سنوات; هذه الاختلافات كانت هامه إحصائيا للطلاقة الدلالية والادراك المعرفي العام. على سبيل المثال ارتبط اختطار الأوعية بانخفاض الادراك المعرفي العام على مدار العشر سنين, (95% confidence interval [CI] = -0.08, -0.05 SD 0.06 في حين ارتبط اختطار العته بانخفاض (95% CI = -0.04, -0.01 SD -0.03, difference in  $\beta$  ) , (coefficients = 0.03; 95% CI = 0.01, 0.05).

**الاستنتاجات:** مجموع اختطار الجلطات الدماغية وذلك بعوامل اختطار الأوعية, تقدم السن والعته (CAIDE) و مجموع اختطار أمراض الأوعية الدموية عامه لدراسه فرامينجهم لهما القدرة على التنبؤ بالانخفاض المعرفي لنهاية منتصف العمر ولكن مجموع اختطار أمراض الأوعية الدموية عامه لدراسه فرامينجهم لها الميزة عن مجموع احراز اختطار العته للإستخدام في الوقاية المبدئية لتقييم اختطار التدني المعرفي مع امكانية استهداف عوامل الاختطار القابلة للتعديل.

Objective: Our aim was to compare 2 Framingham vascular risk scores with a dementia risk score in relation to 10-year cognitive decline in late middle age.

Methods: Participants were men and women with mean age of 55.6 years at baseline, from the Whitehall II study, a longitudinal British cohort study. We compared the Framingham general cardiovascular disease risk score and the Framingham stroke risk score with the Cardiovascular Risk Factors, Aging and Dementia (CAIDE) risk score that uses risk factors in midlife to estimate risk of late-life dementia. Cognitive tests included reasoning, memory, verbal fluency, vocabulary, and global cognition, assessed 3 times over 10 years.

Results: Higher cardiovascular disease risk and higher stroke risk were associated with greater cognitive decline in all tests except memory; higher dementia risk was associated with greater decline in reasoning, vocabulary, and global cognitive scores. Compared with the dementia risk score, cardiovascular and stroke risk scores showed slightly stronger associations with 10-year cognitive decline; these differences were statistically significant for semantic fluency and global cognitive scores. For example, cardiovascular disease risk was associated with  $-0.06$  SD (95% confidence interval [CI] =  $-0.08$ ,  $-0.05$ ) decline in the global cognitive scores over 10 years whereas dementia risk was associated with  $-0.03$  SD (95% CI =  $-0.04$ ,  $-0.01$ ) decline (difference in  $\beta$  coefficients =  $0.03$ ; 95% CI =  $0.01$ ,  $0.05$ ).

Conclusions: The CAIDE dementia and Framingham risk scores predict cognitive decline in late middle age but the Framingham risk scores may have an advantage over the dementia risk score for use in primary prevention for assessing risk of cognitive decline and targeting of modifiable risk factors.

**Translator: Islam Tafish MD, Department of Neurology, Allen Neurology Center, Waterloo, IA**

**Translation Reviewer: Ameer Alnullahassani MD, Department of Neurology, Allen Neurology Center, Waterloo, IA**
